# Supplementary material for: Lunasin Sensitivity in Non-Small Cell Lung Cancer Cells Is Linked to Suppression of Integrin Signaling and Changes in Histone Acetylation
Source: MDPI journal article supplement (doi:10.3390/ijms151223705), 2014-12-18

# Supplementary Information

**Figure S1.** Proliferation of control siRNA transfected H661 cells transfected with a control siRNA or three different siRNAs designed to silence  $\alpha v$  expression individually or in combination. Proliferation assays were initiated 48 h after transfection with siRNAs; cells were treated with either 50 mM sodium phosphate buffer (vehicle) or 100  $\mu$ M lunasin. Data shown are the mean  $\pm$  SD obtained in three independent experiments.

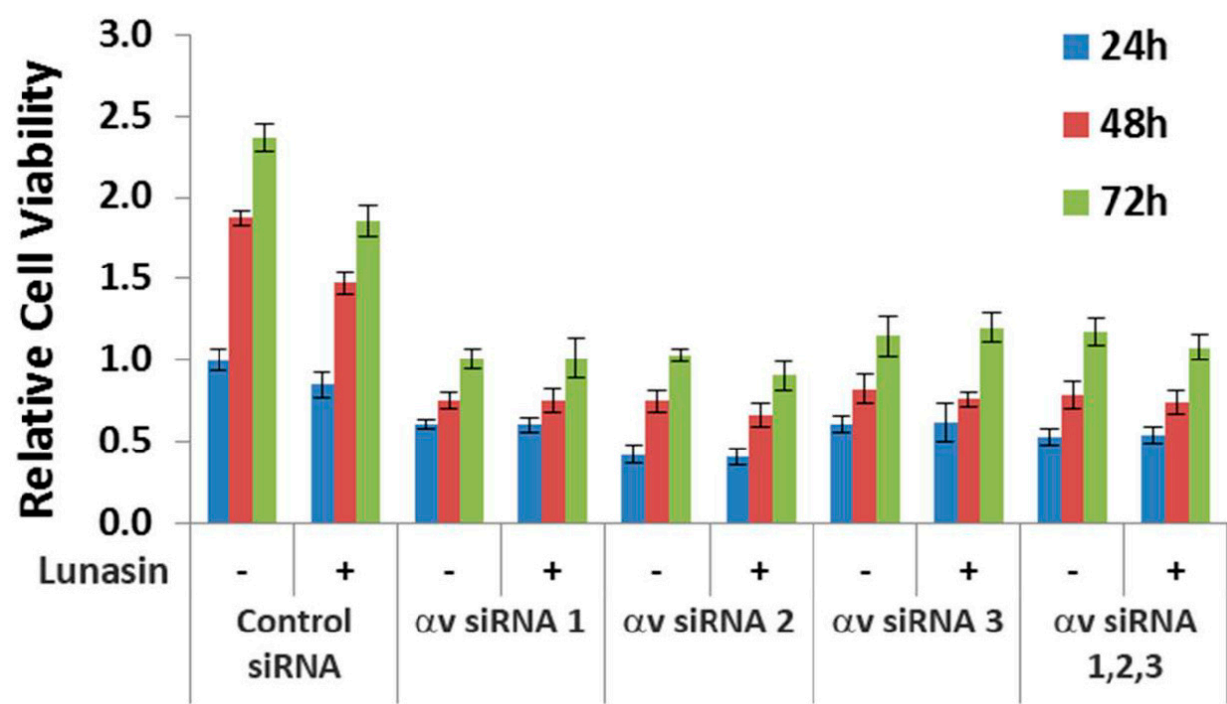

Supplement: s1 [file s1]
